# Supplementary material for: Aging-related changes in the gene expression profile of human lungs
Source: publisher site journal article supplement (doi:10.18632/aging.103885), 2020-11-09
Supplement: Supplementary file [file aging-v12i21-103885-supplementary-material-SD1.pdf]

## SUPPLEMENTARY TABLES

**Supplementary Table 1. Primer sequences for qRT-PCR analysis.**

| Gene symbol | Forward                 | Reverse                | Accession number |
|-------------|-------------------------|------------------------|------------------|
| MAP3K15     | CCTTCTACGACGCAGATGTTG   | GCATCGGTGTCATGGTACAAGA | NM_001001671     |
| CHRM2       | AACTCCTCTAACAATAGCCTGGC | GTTCCCGATAATGGTCACCAA  | NM_000739        |
| GALNT13     | TTGCCCTTAATAGAAGTCTGCCA | TGGGGAACGATTATCACACTG  | NM_052917        |
| COL17A1     | ACCAGCAATGGCTATGCTAAAA  | GCCTCGTGTGCTTCCAGTT    | NM_000494        |
| EDA2R       | TCCAAGGATTGTGGTTATGGAGA | AGCACAGGTGATGCAACTCTG  | NM_021783        |

**Supplementary Table 2. Results of multiple linear regression analysis of 5 genes associated with aging .**

### Model Summary<sup>b</sup>

| Model | R                  | R square | Adjusted R square | Standard error of the estimate | Durbin-Watson |
|-------|--------------------|----------|-------------------|--------------------------------|---------------|
| 1     | 0.743 <sup>a</sup> | 0.552    | 0.516             | 10.716                         | 0.960         |

a. Predictors: (Constant), EDA2R, CHRM2, COL17A1, MAP3K15, GALNT13.

b. Dependent variable: Age.

### ANOVA<sup>a</sup>

| Model |            | Sum of squares | df | Mean square | F      | Sig.               |
|-------|------------|----------------|----|-------------|--------|--------------------|
| 1     | Regression | 8783.068       | 5  | 1756.614    | 15.298 | 0.000 <sup>b</sup> |
|       | Residual   | 7119.402       | 62 | 114.829     |        |                    |
|       | Total      | 15902.471      | 67 |             |        |                    |

a. Dependent variable: Age.

b. Predictors: (Constant), EDA2R, CHRM2, COL17A1, MAP3K15, GALNT13.

### Coefficients<sup>a</sup>

| Model |            | Unstandardized coefficients |            | Standardized coefficients | t      | Sig.  | Collinearity statistics |       |
|-------|------------|-----------------------------|------------|---------------------------|--------|-------|-------------------------|-------|
|       |            | B                           | Std. error | Beta                      |        |       | Tolerance               | VIF   |
| 1     | (Constant) | 53.153                      | 4.946      |                           | 10.747 | 0.000 |                         |       |
|       | MAP3K15    | 0.021                       | 4.733      | 0.001                     | 0.004  | 0.997 | 0.504                   | 1.984 |
|       | CHRM2      | -1.822                      | 2.736      | -0.069                    | -0.666 | 0.508 | 0.676                   | 1.479 |
|       | GALNT13    | -6.203                      | 4.538      | -0.188                    | -1.367 | 0.177 | 0.380                   | 2.628 |
|       | COL17A1    | 0.037                       | 0.111      | 0.031                     | 0.335  | 0.738 | 0.837                   | 1.195 |
|       | EDA2R      | 43.459                      | 8.211      | 0.581                     | 5.293  | 0.000 | 0.600                   | 1.668 |

a. Dependent variable: Age.

**Abbreviation:** VIF, Variance inflation factor; Std., Standard; Sig., Significance.

**Supplementary Table 3. Results of multiple linear regression analysis of 5 genes associated with aging with adjustment for history of smoking and gender.**

**Model Summary<sup>b</sup>**

| Model | R                  | R square | Adjusted R square | Standard error of the estimate | Durbin-Watson |
|-------|--------------------|----------|-------------------|--------------------------------|---------------|
| 1     | 0.772 <sup>a</sup> | 0.596    | 0.549             | 10.342                         | 1.140         |

a. Predictors: (Constant), EDA2R, CHRM2, COL17A1, MAP3K15, GALNT13, History of smoking, Gender.

b. Dependent variable: Age.

**ANOVA<sup>a</sup>**

| Model |            | Sum of squares | df | Mean square | F      | Sig.               |
|-------|------------|----------------|----|-------------|--------|--------------------|
| 1     | Regression | 9484.607       | 7  | 1354.944    | 12.667 | 0.000 <sup>b</sup> |
|       | Residual   | 6417.863       | 60 | 106.964     |        |                    |
|       | Total      | 15902.471      | 67 |             |        |                    |

a. Dependent variable: Age.

b. Predictors: (Constant), EDA2R, CHRM2, COL17A1, MAP3K15, GALNT13, History of smoking, Gender.

**Coefficients<sup>a</sup>**

| Model | Unstandardized coefficients |            | Standardized coefficients | t      | Sig.   | Collinearity statistics |       |
|-------|-----------------------------|------------|---------------------------|--------|--------|-------------------------|-------|
|       | B                           | Std. error | Beta                      |        |        | Tolerance               | VIF   |
|       | (Constant)                  | 57.028     | 5.978                     |        | 9.539  | 0.000                   |       |
|       | MAP3K15                     | 1.125      | 4.590                     | 0.028  | 0.245  | 0.807                   | 0.499 |
|       | CHRM2                       | -0.344     | 2.704                     | -0.013 | -0.127 | 0.899                   | 0.645 |
|       | GALNT13                     | -9.289     | 4.543                     | -0.282 | -2.045 | 0.045                   | 0.354 |
| 1     | COL17A1                     | -0.007     | 0.109                     | -0.006 | -0.064 | 0.949                   | 0.804 |
|       | EDA2R                       | 46.831     | 8.081                     | 0.626  | 5.795  | 0.000                   | 0.577 |
|       | History of smoking          | -7.636     | 3.667                     | -0.246 | -2.082 | 0.042                   | 0.483 |
|       | Gender                      | -0.879     | 3.625                     | -0.028 | -0.242 | 0.809                   | 0.507 |

a. Dependent variable: Age.

**Abbreviation:** VIF, Variance inflation factor; Std., Standard; Sig., Significance.
