# Supplementary material for: Aging-related changes in the gene expression profile of human lungs
Source: publisher site journal article supplement (doi:10.18632/aging.103885), 2020-11-09
Supplement: Supplementary file [file aging-v12i21-103885-supplementary-material-SD2.pdf]

# SUPPLEMENTARY FIGURES

## Supplementary Figures

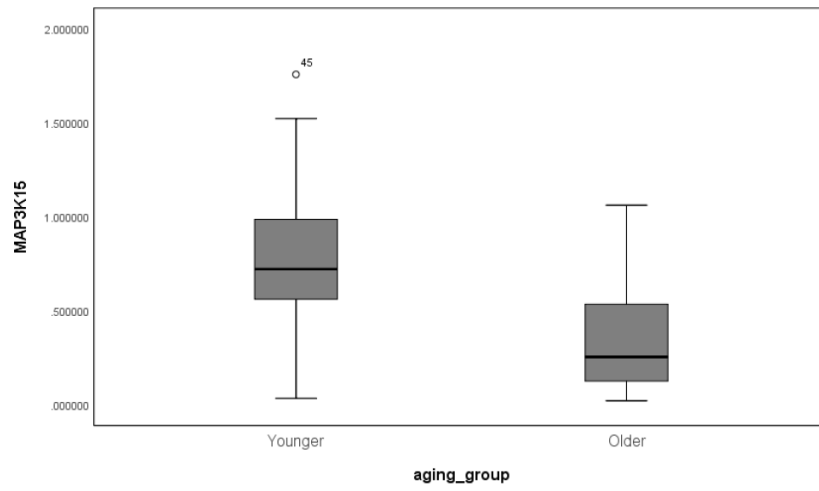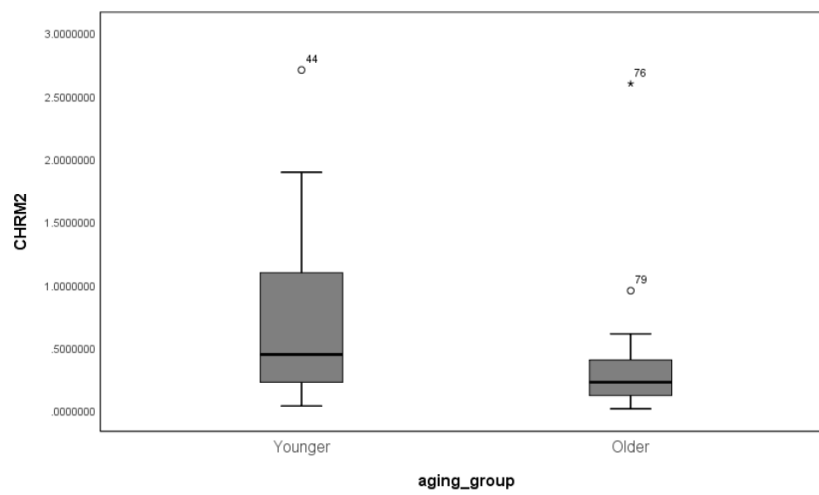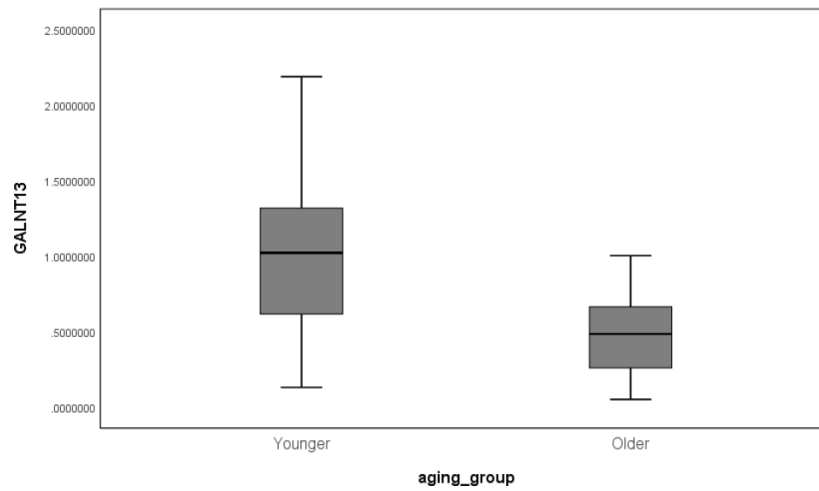

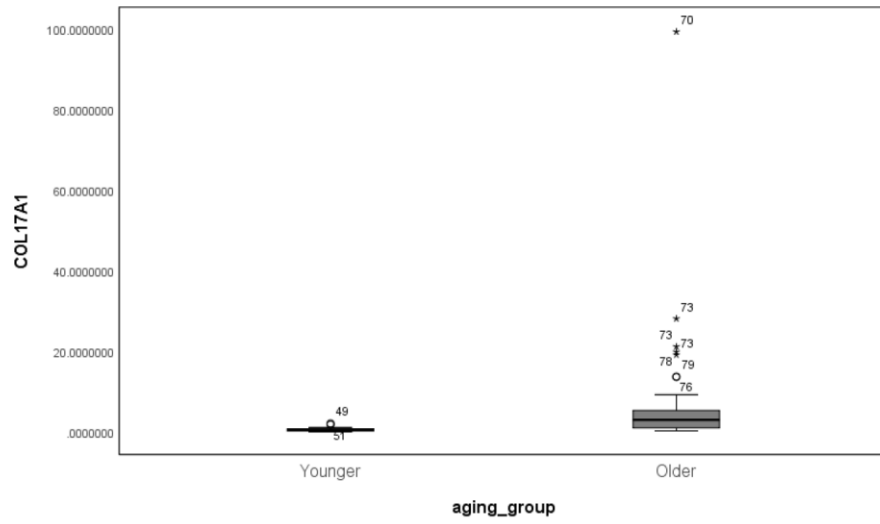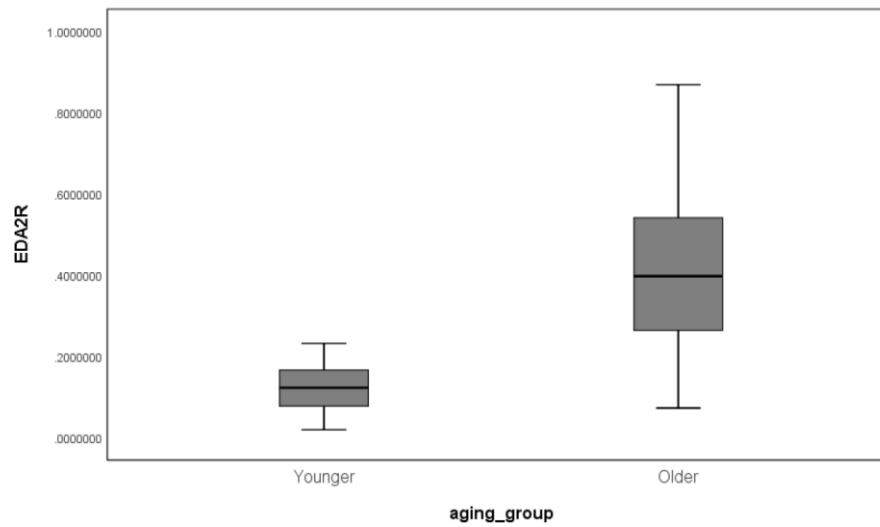

**Supplementary Figure 1. Box plots of the expression profile (based on FPKM value) of the top 5 DEGs that showed significant differences in DEG analysis according to the age group.**
